# Supplementary material
Source: PubMed Central journal article supplement (PMC556406)
Supplement: 7600603s1.pdf [file 7600603s1.pdf]

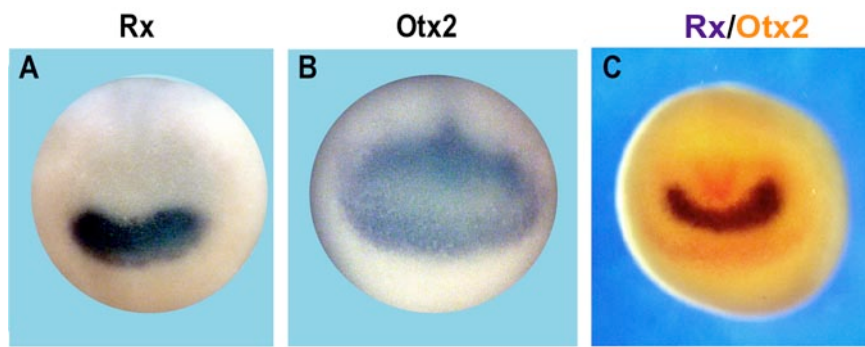

**Supplementary Figure 1:** Otx2 is a marker for fore- and midbrain at stage 14. **A,B**, Expression of Rx in the early eye field (A) and Otx2 in the fore- and midbrain region (B). Note the weaker expression of Otx2 in the region where Rx is expressed. **C**, A double whole mount in situ hybridization for Rx and Otx2 at stage 14 is shown. Expression of Rx, an eye specific marker gene, is shown in blue, Otx2 is represented by the red color. Otx2 is not considered to be a eye specific marker gene at stage 14. Panels A and B are identical to Figure 1 O and S of the manuscript. At stage 23/24, however, Otx2 is highly expressed in the eye anlage (see Figure 6 J).
