# Supplementary material
Source: PubMed Central journal article supplement (PMC556406)
Supplement: 7600603s2.pdf [file 7600603s2.pdf]

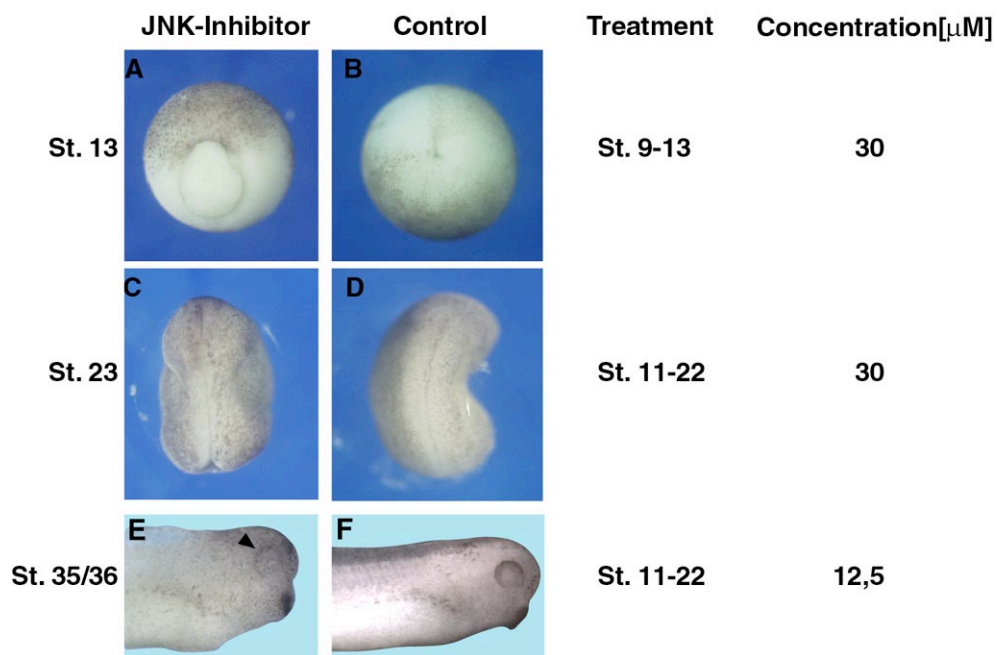

**Supplementary Figure 2:** The JNK inhibitor SP600125 elicits different phenotypes depending on concentration and timing of treatment. Embryos were treated during different stages with different concentrations of SP600125 as indicated. **A,B**, Treatment between stage 9 and 13 ( $30 \mu\text{M}$ ) results in gastrulation defects at stage 13. **C,D**, Treatment between stage 11 and 22 with a high concentration ( $30 \mu\text{M}$ ) results in an open neural plate phenotype at stage 23. **E,F**, Treatment with a lower concentration ( $12.5 \mu\text{M}$ ) between stage 11 and 22 results in small eyes (arrow head) at stage 35/36. Panels E and F are identical to Figure 2 F and H of the manuscript.
