# Supplementary material
Source: PubMed Central journal article supplement (PMC556406)
Supplement: 7600603s3.pdf [file 7600603s3.pdf]

| Clone | Gene                                                         | GenBank<br>Accession No. | Expression in |                 |                 |
|-------|--------------------------------------------------------------|--------------------------|---------------|-----------------|-----------------|
|       |                                                              |                          | Eye           | Pro-<br>nephros | Floor-<br>plate |
| A1B   | homology with<br>MIZF (Hs)                                   | XP_051422.1              |               |                 |                 |
| A1D   | cytoskeletal actin<br>type-5                                 | M24769                   |               | +               |                 |
| A3A   | pescadillo                                                   | AAH43950                 | +             | +               |                 |
| A4A   | XFDL 141                                                     | XLU65897                 |               |                 |                 |
| A5E   | homology with<br>MGC68561 protein<br>(XI)                    | AAH59966.1               |               |                 |                 |
| A5F   | homology with<br>OST48 (Cf)                                  | DOGOST48A                |               |                 |                 |
| A6B   | gp96                                                         | AAO21339                 |               | +               |                 |
| A6E   | homology with<br>prothymosin alpha<br>(Mm)                   | NP_032998.1              | +             |                 |                 |
| A7B   | homology with<br>presenilin<br>enhancer2 (Dr)                | BJ029038                 |               | +               |                 |
| A7D   | XTRAP-gamma<br>subunit                                       | AB058505                 |               | +               |                 |
| A9B   | homology with<br>phosphoserine<br>phosphatase (Hs)           | NP_004568.1              |               |                 |                 |
| A9E   | DUF87                                                        | AB004793                 | +             | +               |                 |
| A10C  | FXR1                                                         | U25163                   |               |                 | +               |
| A10E  | homology with<br>annexin A2                                  | BC046669                 | +             |                 |                 |
| B2C   | homology with<br>Solute carrier family<br>2 transporter (Gg) | NP_997061                |               |                 |                 |
| B4A   | homology with CtBP<br>(XI)                                   | BC076800.1               |               |                 |                 |
| B9F   | EAF2                                                         | AJ579576                 | +             | +               |                 |
| B10A  | XHSP105                                                      | BC077316                 |               |                 |                 |
| B12B  | homology with<br>MAPK7 (XI)                                  | BC077412.1               |               |                 |                 |
| B12D  | XNCp120.1.2<br>isoform 1                                     | AF150744.1               |               |                 |                 |
| C1G   | XWSTF                                                        | AF412333                 | +             |                 |                 |
| D9E   | XCHRAC17                                                     | AY271302.1               | +             |                 |                 |
| E11F  | YB3                                                          | X60217                   |               | +               |                 |

**Supplementary Table 1:** Genes identified to be upregulated by Wnt-4. A list of genes is given that have been shown to be upregulated by Wnt-4 in noggin/FGF animal caps. Specific expression domains were determined by whole mount in situ hybridization and are indicated if the potential target gene is expressed in the floor plate or the pronephros, two sites of Wnt-4 expression, indicating the validity of the screen. Eye specific expression is indicated as well. Not all isolated genes revealed a

specific expression pattern. This might be due to the relative small inserts in these clones. Additional 21 clones revealed no homology in a BLAST comparison and most likely represent untranslated and not well conserved regions. Accession numbers are given as well. Dr: *Drosophila melanogaster*, Mm: *Mus musculus*, Xl: *Xenopus laevis*, Gg: *Gallus gallus*, Cf: *Canis familiaris*.
